1  
2  
3  
4  
5  
6  
7  
8  
9  
10  
11  
12  
13  
14  
15  
16  
17  
18  
19  
20  
21  
22  
23  
24  
25  
26

# **The evolution of phenotypic plasticity in response to temperature stress**

Francois Mallard, Viola Nolte & Christian Schlötterer

Institut für Populationsgenetik, Vetmeduni Vienna, Austria

**Running title :**  
Evolution of plasticity in *Drosophila*

**Keywords:** temperature adaptation, *Drosophila*, gene expression, phenotypic plasticity, experimental evolution

Corresponding author: Christian Schlötterer  
Email: christian.schloetterer@vetmeduni.ac.at

## 27    **Abstract**

28    Phenotypic plasticity is the ability of a single genotype to produce different  
 29    phenotypes in response to environmental variation. The importance of  
 30    phenotypic plasticity in natural populations and its contribution to phenotypic  
 31    evolution during rapid environmental change is widely debated. Here, we show  
 32    that thermal plasticity of gene expression in natural populations is a key  
 33    component of its adaptation: evolution to novel thermal environments increases  
 34    ancestral plasticity rather than mean genetic expression. We determined the  
 35    evolution of plasticity in gene expression by conducting laboratory natural  
 36    selection on a *Drosophila simulans* population in hot and cold environments.  
 37    After more than 60 generations in the hot environment, 325 genes evolved a  
 38    change in plasticity relative to the natural ancestral population. Plasticity  
 39    increased in 75% of these genes, which were strongly enriched for several well-  
 40    defined functional categories (e.g. chitin metabolism, glycolysis and oxidative  
 41    phosphorylation). Furthermore, we show that plasticity in gene expression of  
 42    populations exposed to different temperatures is rather similar across species.  
 43    We conclude that most of the ancestral plasticity can evolve further in more  
 44    extreme environments.

## 45 **Introduction**

46 Phenotypic plasticity is of great interest in ecology and evolution, because it  
 47 describes the ability of single genotypes to produce distinct phenotypes in  
 48 different environments (Pigliucci 2001). When populations encounter  
 49 environmental change, plastic traits will result in phenotypic alterations without  
 50 genetic response (Price et al. 2003). Of particular importance are those adaptive  
 51 plastic responses where the altered phenotype is associated with higher fitness,  
 52 because they provide a selective advantage in variable environments  
 53 (Charmantier et al. 2008; Dey et al. 2016; Ghalambor et al. 2007; Nussey et al.  
 54 2006; Suzuki et al. 2006) or during adaptation to a rapid environmental shift.  
 55 Phenotypic plasticity is well documented for a broad range of phenotypes  
 56 including morphological or life history traits (West-Eberhard 2003; Whitman et  
 57 al. 2009). The technological advances in quantifying gene expression levels for  
 58 entire transcriptomes have shifted the emphasis to gene expression patterns  
 59 because many traits/phenotypes can be accurately quantified in a single  
 60 experiment (Chen et al. 2015; Huang and Agrawal 2016; Zhao et al. 2015).  
 61 Despite the conceptual appeal of adaptive plasticity in natural populations, our  
 62 understanding of phenotypic plasticity in natural populations is still in its infancy  
 63 (Forsman et al. 2015; Hendry et al. 2016; Merilä et al. 2014; Pigliucci 2005). In  
 64 addition to adaptive plasticity, traits may be plastic in natural populations for  
 65 other reasons: 1) neutral plasticity: variation in the trait has no fitness  
 66 consequences (Via 1993) 2) deleterious plasticity: variation in the expression of  
 67 the trait may be deleterious and selection operates to minimize it (Dewitt et al.  
 68 1998; Ghalambor et al. 2007). The comparison of populations in a common  
 69 garden experiment is an intuitive and popular approach to infer the selective

70 forces operating on plasticity (Merilä et al. 2014; Levis and Pfenning 2016).  
71 Nevertheless, the link between plasticity and adaptation is only correlative and  
72 may arise from other changes, not related to adaptation to the environmental  
73 contrasts.

74 Experiments relying on standing genetic variation to study the evolution of  
75 plasticity are well-placed in the framework of genetic accommodation (Braendle  
76 and Flatt 2006): complex traits with multiple contributing loci can respond  
77 quickly to environmental shifts. Hence, phenotypic plasticity could be rapidly  
78 modulated in response to selection. Exposing natural populations to more  
79 extreme environments provides clear predictions about the evolution of  
80 plasticity (Chevin and Hoffmann 2017). While random changes in plasticity are  
81 expected under neutrality, in the case of deleterious (costly) plasticity, reduced  
82 plasticity is predicted (counter-gradient evolution). An increase in plasticity is  
83 expected when plasticity is adaptive: genetic changes in the novel environment  
84 will reinforce the ancestral plasticity (Ghalambor et al. 2007, Ho and Zhang  
85 2018). No change in plasticity is difficult to interpret because it may reflect  
86 absence of genetic variation, but also weak selection or neutral plasticity result  
87 in the same outcome. Experimental evolution is a powerful approach to  
88 distinguish between random and directed changes in plasticity because  
89 environmental conditions can be tightly controlled and replicated experiments  
90 provide more reliable results.

91 In *Drosophila*, the evolution of gene expression plasticity has been studied for a  
92 range of different environmental stressors, ranging from alcohol to heavy metals  
93 and temperature (Chen et al. 2015; Huang and Agrawal 2016; Zhao et al. 2015;  
94 Clemson et al. 2016; Levine et al. 2011; Porcelli et al. 2016; Yampolski et al.

2012; Zhou et al. 2012). Natural *Drosophila* populations are exposed to daily and seasonal temperature fluctuations (Bergland et al. 2014; Machado et al. 2016), making this a particularly relevant abiotic factor in the context of phenotypic plasticity (Angilletta and Angilletta 2009). Measuring gene expression of a single heterozygous *D. melanogaster* genotype at four different temperatures showed that 83 % of the expressed genes exhibit a plastic expression pattern when exposed to a temperature gradient ranging from 13 to 29 °C (Chen et al. 2015). The variation in gene expression plasticity of natural *Drosophila* populations along latitudinal clines (Zhao et al. 2015; Porcelli et al. 2016) suggests that some of the plastic responses are driven by selection. We study the evolution of plasticity to infer the influence of high and low temperature regimes on the plasticity of gene expression in *Drosophila simulans* using laboratory natural selection (Fuller et al. 2005, see experimental design in Fig. 1). Specifically, we address the question how adaptation to more extreme temperatures modulates the plastic response of traits, which were already plastic in the founder population. We show that phenotypic plasticity does not prevent evolution. Rather, adaptation to more extreme temperature regimes increases the plastic response. In combination with clinal variation of gene expression in natural populations of both *D. simulans* and *D. melanogaster* (Zhao et al. 2015), our data provide convincing experimental evidence for adaptive phenotypic plasticity in a natural population.

## Materials and Methods

### Laboratory natural selection procedure

The laboratory natural selection setup is detailed in Mallard et al. (2018). In brief, 10 replicated *Drosophila simulans* populations were setup from 250 isofemale

lines collected in Northern Portugal in 2008. The replicated populations are maintained under two fluctuating temperature regimes (5 replicates in each): either a hot (mean temperature 23°C) or a cold treatment (mean temperature 15°C). In each environment, the temperature changed with a 10°C amplitude centered on the mean temperature synchronized on a 12/12 hours light/dark cycle. The same maintenance regime was used for populations in both temperature environments, only adjusting for the increased developmental time in the cold environment. Every generation, 1000 flies are sampled from the eclosed flies and distributed over 5 fresh bottles containing 70 ml standard *Drosophila* medium. After two egg layings for 48h and 72h in the hot and cold environment respectively, adults were frozen. We preferentially used the second egg collection for the next generation to avoid selection for early fecundity. We previously showed that the selection regime results in higher fitness of the evolved populations (Mallard et al. 2018).

#### Common garden experiment

Two parallel common gardens with identical experimental procedures were performed in a hot (23°C) and a cold (15°C) environment using eggs from the evolved populations at generation 39 (cold) and 64 (hot). Additionally, 5 replicates of the ancestral population were reconstituted from the founder isofemale lines. After two generations in the assayed environment, the second one with controlled larval density (300 eggs), we collected adults and separated the two sexes under shallow CO<sub>2</sub>. Flies were frozen in liquid nitrogen after a 24h-36h recovery period at 2pm (approximately 6 hours after the start of the light cycle). During experimental evolution, the ancestral population was maintained at 18°C in the form of isofemale lines. The small population size in the isofemale

lines prevents adaptation to the culturing conditions and therefore, the reconstituted population reflects the ancestral population (Nouhaud et al. 2016).

#### Gene expression analysis

For all 15 populations from both common garden temperatures, we generated two RNA-Seq libraries, each from different sets of 25-30 males. We extracted total RNA-Seq using the Qiagen RNeasy Universal Plus Mini protocol (Qiagen, Hilden, Germany) with DNase I treatment according to the manufacturer's instructions. Quality control of the RNA was performed on agarose gels and the Qubit RNA HS or BR Assay kit (Invitrogen, Carlsbad, CA) for quantification. Strand-specific barcoded mRNA libraries were generated using the NEBNext® Ultra Directional RNA Library Prep Kit for Illumina with a protocol modified to allow for a larger insert size than the default 200bp. We purified polyA-mRNA from 3µg total RNA and fragmented for 8 min. The 42°C incubation step in the first-strand synthesis and the 16°C step in the second-strand synthesis were extended to 30 and 90 min., respectively. Size selection for a target insert size of 330bp was performed using AMPure XP beads (Beckman Coulter, Carlsbad, CA). PCR amplification followed the recommended protocol (NEB) with 12 PCR cycles and a 50 sec. extension step. The final libraries were bead-purified, quantified with the Qubit DNA HS Assay kit (Invitrogen, Carlsbad, CA) and pooled in equimolar amounts. To reduce batch effects, we combined libraries from ancestral, cold and hot evolved replicates and sequenced them in the same lane. Libraries were sequenced using a single-read 50bp protocol on a HiSeq2500. We trimmed the raw reads (quality threshold 20, minimum read length 40) using PoPoolation (Kofler et al. 2011). The trimmed reads were aligned to the *Drosophila simulans* reference genome (Palmieri et al. 2014) with GSNAP (Wu et

170 al. 2010) using a hadoop cluster. All subsequent analysis were performed in R  
 171 (Team RC 2019) including read counts (Liao et al. 2013) and differential gene  
 172 expression (Robinson et al. 2010). We normalized gene expression levels with  
 173 the TMM method, restricting our analysis to the genes with an overall mean  
 174 expression above one count per million (CPM) 11,200 genes). We used negative  
 175 binomial GLMs to estimate the effect of selection regime, temperature, and their  
 176 interaction on gene expression. We then computed ad hoc contrasts to find  
 177 differentially expressed genes between groups of interest using likelihood ratio  
 178 tests (*glmLRT* in edgeR). This allow us to determine for each gene whether the  
 179 difference in expression either between two groups of samples (such as the  
 180 effect of temperature on a given evolved population) or for a linear combination  
 181 of these groups (such as the difference between the reaction norms of two  
 182 populations) is statistically significant. The Benjamini-Hochberg procedure was  
 183 applied to control for false discovery rate (Benjamini et al. 1995). All plasticity  
 184 estimates as well as evolved differences between ancestral and evolved  
 185 populations plotted in the manuscript are model fit values obtained from these  
 186 contrasts.

187 When comparing the gene expression of evolved populations against the  
 188 ancestral ones at a given temperature, we always used  $FDR < 0.05$  (unless  
 189 specified differently). We allowed a higher rate of false positive when testing for  
 190 reaction norms between ancestral and evolved populations ( $FDR < 0.1$ ). This was  
 191 done because we restricted our analysis to genes that were already differentially  
 192 expressed in at least one temperature with a stringent FDR. Once identified the  
 193 genes showing a significant evolution of their reaction norms, we compared the  
 194 absolute value of the ancestral and the evolved reaction norms to distinguish

195 between cases of reduced and increased plasticity. Gene ontology enrichment  
196 was performed with Gorilla (Eden et al. 2009) using the complete list of retained  
197 genes (n=11,200) as background data set and a FDR<0.05. We compared the  
198 number of genes that evolved increased or decreased plasticity in the hot  
199 evolved populations using a generalized linear model with a binomial  
200 distribution. The estimated probability was compared to the 0.5 using a Wald  
201 test.

202 In a second GLM, we analyzed the replicate specific evolutionary response. We  
203 considered only the samples from the Ancestral and the Hot evolved populations  
204 and each evolved population was treated as a different level of the “selection  
205 regime” factor. The model formula was similar to the previous one but this latter  
206 factor contained 6 levels (Ancestral and each of the 5 hot evolved replicate). We  
207 processed as described above to detect genes with evolved differential  
208 expression.

#### 209 Detection of false positive genes with increasing plasticity

210 To avoid false positives, we restricted our set of candidate genes to those with a  
211 significant change in expression in at least one of the two environments (15°C or  
212 23°C) and a significant interaction effect. The rationale can be explained by  
213 considering genes that evolved in expression in only one environment, but  
214 remained unchanged in the second environment. Adding some minor random  
215 noise could either result in a positive or negative correlation of the expression  
216 changes in both temperatures. Because negative correlation increases the  
217 significance in the interaction test, it may be possible that such random  
218 fluctuations could bias our results towards the observed excess of genes with  
219 increased plasticity. To rule out that such a potential bias affected our results, we

performed an additional test contrasting the ancestral plasticity and the plasticity of a hypothetical population that would have evolved its expression only at one temperature (i.e. replacing the expression levels of the evolved population in the second environment by the ancestral values). For all genes with a significant change in plasticity, we also detected a significant change in plasticity when we considered only the expression change in only one environment. We conclude that none of these genes are false detected due to a random measurement error in the second environment.

#### RNA-Seq quality control

We performed several analyses to test the quality of each library. We first estimated heterogeneity in coverage (3' bias) of the 20% longest genes of the *D. simulans* annotation using the geneBody coverage tool implemented in the RSeQC package (Wand et al. 2012). Following Mallard et al. (2018), we removed strongly biased libraries (12 libraries in total). Additionally, we quantified the expression of 12 chorion and yolk protein genes to identify female contamination due to sexing mistakes or sample swap. We excluded libraries showing a total log<sub>2</sub> normalized expression of these genes higher than eight (4 libraries, see Fig. S6). These four libraries contained at least sixteen times the number of transcripts in the remaining libraries (see Fig. S6). After removing the biased and contaminated libraries, a total of 44 libraries remained for the analysis (less than 1.5 samples per population). Out of these 44 libraries, 16 combinations of populations and treatment had only one library left and 14 had 2 libraries. We retained only one measurement per population (n=30) by summing the gene counts of samples coming from the same population. Before pooling the libraries, we visually inspected the samples using multi-dimensional

245 scaling plots (Fig. S1). These plots inform about pairwise distance between  
246 samples. While the replicates within a temperature regime were not well  
247 separated, robust differences between the ancestral and the two groups of  
248 evolved populations were seen. The number of mapped reads for each sample  
249 can be found in Table S6.

250

251 **Results**

252 We measured the gene expression patterns of our ancestral population and the  
253 two evolved populations in two parallel common gardens at 15°C and 23°C. The  
254 analysis of evolution of gene expression plasticity is complex and we followed a  
255 three-step analysis as described in Figure 1.

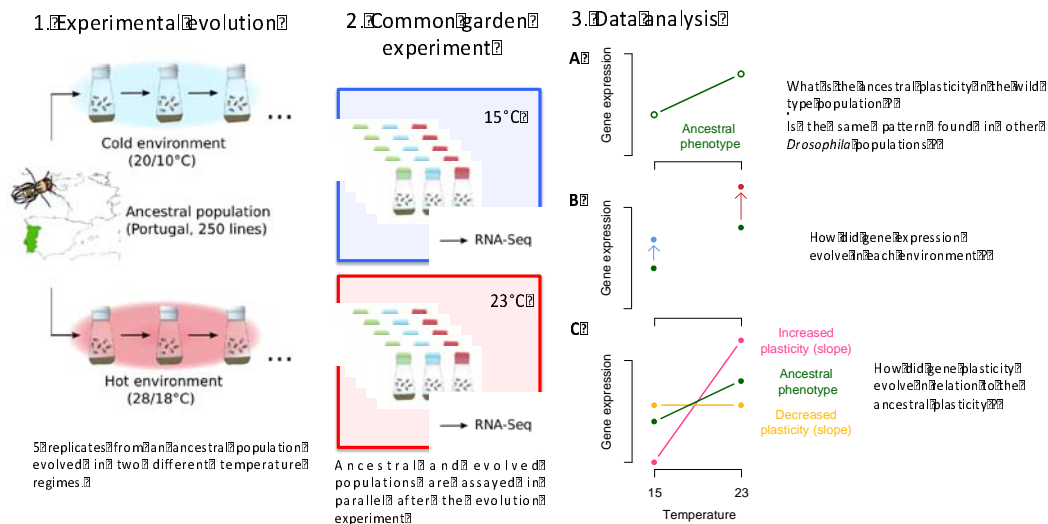

256

257 Fig. 1: Experimental design. 1) We evolved two sets of five populations in either cold or hot  
258 laboratory environments for 39 and 64 generations, respectively. 2) We measured gene  
259 expression in two common gardens, where the evolved populations together with the ancestral  
260 one were phenotyped at either 15°C or 23°C. 3) Gene expression analysis was done in three  
261 successive steps. A) We first explored the plasticity of our ancestral population and compare it to  
262 existing data sets. B) We investigated gene expression changes at 15°C and 23°C in the evolved  
263 populations. C) We determined the evolved plasticity by measuring each of the evolved  
264 populations in both temperature regimes. The evolved plasticity is compared to the ancestral one  
265

266

Gene expression plasticity in the ancestral population (Fig. 1 – panel 3A)

267 We determined temperature mediated plasticity of gene expression by exposing  
 268 the ancestral, hot evolved and cold evolved population to 15°C and 23°C. As  
 269 expected from previous studies (Zhou et al. 2012; Chen et al. 2015), the  
 270 expression of a large number of genes was modulated by temperature.  
 271 Down-regulated genes, which are expressed at lower levels at 23°C than at 15°C  
 272 in the ancestral population, are enriched for several GO categories including  
 273 chitin-based cuticle and transmembrane transport genes (Table S1). Eighty-nine  
 274 (83%) of the significant GO terms are also identified among the genes decreasing  
 275 in expression at higher temperatures in *D. melanogaster* (out of 107 GO terms  
 276 classified in Chen et al. (2015)). This overlap is probably conservative, because  
 277 the sex of the flies analyzed and the temperature regimes differed between  
 278 studies (Chen et al. (2015) measured females in 4 different temperatures).  
 279 Interestingly Zhao et al. (2015) found that chitin genes were among the top  
 280 plastic genes shared between *D. melanogaster* and *D. simulans*. In particular, the  
 281 category “structural constituent of chitin-based cuticle” was consistently  
 282 identified for genes decreasing with temperature across all three studies.  
 283 Genes that are more highly expressed at 23°C than at 15°C in the ancestral  
 284 population (up-regulated genes) are enriched for genes involved in translation,  
 285 including a large number of ribosomal genes. Out of 21 GO terms, which were  
 286 also enriched in Chen et al. (2015), 18 are classified as increasing in both analysis  
 287 (Table S2). None of these categories were reported in Zhao et al. (2015).  
 288 Such highly consistent gene expression changes across different experiments,  
 289 suggest a highly robust pattern of plasticity, which is conserved not only among  
 290 populations, but also between species.  
 291 Evolution of gene expression in the focal temperature regime (Fig. 1 - panel 3B)

Only a small number of genes was differentially expressed in populations evolved in the cold environment when compared to the ancestral population (see Table S3 FDR<0.05; 42 genes at 15°C). A quite different pattern was observed for the hot-evolved populations. In the comparison to the ancestral population, 725 genes (see Table S4) were differentially expressed at 23°C. The small impact of adaptation to cold temperature may be the consequence of fewer generations in the new environment compared to the hot-evolved populations. But we cannot distinguish this effect from temperature-specific effects triggering a more pronounced evolution in the hot environment.

### Evolution of gene expression plasticity (Fig. 1 – panel 3C)

With about 32% (n=3,602, FDR<0.05) of the expressed genes being differentially expressed between the two assaying temperatures the cold evolved population was slightly less plastic than the ancestral population (n=4,352, 39%, see Table S1). The hot evolved population had about 44% (n=4,909) plastic genes, which corresponds to about 15% more differentially expressed genes than the other two populations. These differences remain stable even when controlling for the overall library sizes by down sampling (see Fig. S3).

We evaluated the evolution of plasticity by correlating gene expression plasticity ( $\log_2FC$  between 15° and 23°C, i.e. the slopes shown in Fig. 1- panel 3C) in the ancestral population with the plasticity in the evolved populations. If the plasticity did not change during evolution, a high correlation is expected. Indeed, the plasticity was highly correlated between ancestral and evolved populations (Pearson correlation coefficients: 0.91 (cold evolved) and 0.89 (hot evolved), Fig. 2). Despite this overall conservation of gene expression plasticity, a closer inspection of Figure 2 (right panel) shows that for some genes plasticity changed

317 after evolution in the hot environment, but the direction of plasticity is not  
318 affected (i.e.: the plasticity became more extreme).

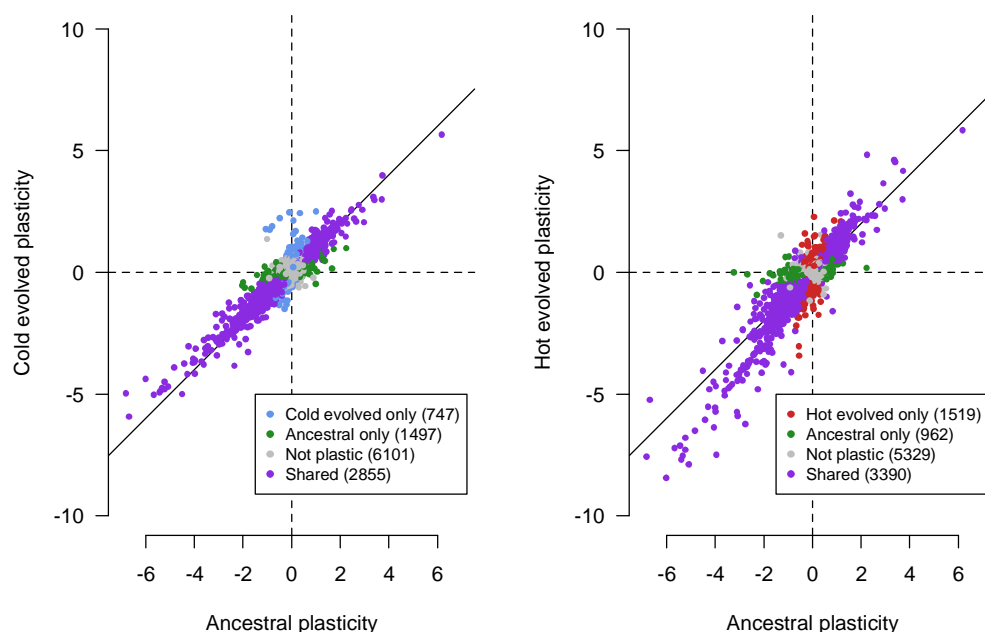

319

320 Fig. 2: Evolution of gene expression plasticity after selection in cold (left) or hot environments  
321 (right). Plasticity is measured as the  $\log_2$  fold change of gene expression at 15°C and 23°C. We  
322 compare the plasticity of the ancestral population (x-axis) plotted against the plasticity of the  
323 evolved populations. Overall, the pattern of gene expression plasticity is conserved for many  
324 genes (purple). Genes that are significantly plastic in only one population have lower  $\log_2$  fold  
325 changes in other population (green, blue and red dots). Despite this overall conservation of  
326 plasticity, highly plastic genes tend to deviate from the solid line in the hot evolved populations  
327 (slope=1) indicating an increased plasticity.

328

329 In the cold evolved replicate populations, only a small subset of the genes that  
330 evolved a change in expression at 15°C or 23°C displayed a significant difference  
331 in the plasticity relative to the ancestral population (2 at 15°C and 2 genes at  
332 23°C, FDR < 0.1).

333 Among the genes that evolved gene expression differences in the hot-evolved  
334 populations either at 15°C or at 23°C (n=930), we distinguished three different  
335 classes: 1) genes with significant change in plasticity (325 genes, FDR<0.1); 2)

genes with small differences in the magnitude of gene expression differences (log<sub>2</sub>FC) between the evolved and the ancestral population in each environment - here, a reliable detection of changes in plasticity or constitutive expression differences is not possible ; 3) genes with no change in plasticity, but constitutive expression differences (i.e. a change in the same direction at both temperatures, FDR<0.05, n=50). This third class of genes was enriched for oxido-reduction processes suggesting a global down-regulation of detoxification genes (FDR<0.1, 6 cytochrome p450 genes, 2 UDP-glucuronosyltransferases). Because some of these genes were also down-regulated in the cold evolved populations (23 genes using FDR<0.1 including 6 p450 genes, see Table S3), we conclude that their constitutive change in expression is not directly related to absolute temperature but a response to either temperature stress or to adaptation to shared environmental conditions.

Among the 325 genes with a significant evolution of plasticity, we noticed significantly more genes with increased plasticity (n=241) than with decreased plasticity (n= 84, p<0.001). This result is not biased by ancestrally non-plastic genes that cannot decrease plasticity: the ratio of genes with increased plasticity to genes with decreased plasticity does not change when only ancestrally plastic genes are analyzed (log<sub>2</sub>FC > 1 in the ancestral population, n=62 and 20 respectively, p<0.001). No GO categories were enriched for genes with reduced phenotypic plasticity. In contrast, genes with increased phenotypic plasticity were enriched for several GO terms (116 processes, 34 functions and 28 components). Because the different number of genes in both categories may have affected the enrichment tests, we randomly selected multiple sets of 85 genes among the 242 significant ones and performed the GO analysis for each set. We

361 obtained significantly more enriched processes genes that evolved an increased  
362 plasticity (20 bootstrap iterations,  $p < 0.0004$ ; mean number of enriched  
363 processes 18.3). Two particularly prominent classes of GO terms were either  
364 related to cuticle formation and chitin production or metabolism including the  
365 electron transport chain and glucose metabolic processes.

366 For most of the genes that evolved a difference in gene expression between  
367 ancestral and evolved populations, there is a significant change at only one  
368 temperature ( $FDR < 0.05$ ). Nevertheless, we noted a strong negative correlation  
369 for the sign of the expression differences between hot evolved and founder  
370 populations at 15°C and 23°C (Fig. 3,  $\chi^2_{1,241} = 133$ ,  $p < 0.0001$ , see also Fig. S4 for a  
371 complementary test), suggesting that evolution modulated the temperature  
372 sensitivity of gene expression. This negative correlation is particularly  
373 pronounced for genes involved in energy production (see Figs. 4 and S2 for  
374 glycolysis and oxidative phosphorylation) but also for chitin related genes.

375 On the other hand, genes that evolved a decreased plasticity show a much  
376 weaker correlation of the sign of expression change between temperatures  
377 ( $\chi^2_{1,84} = 2.8$ ,  $p = 0.09$ ).

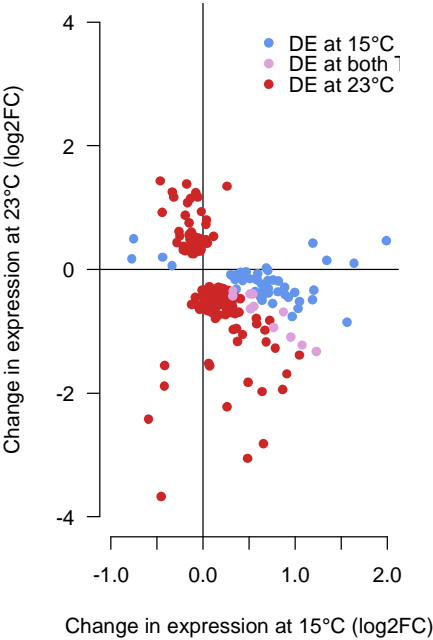

378

379 Fig. 3: Log<sub>2</sub>FC in gene expression of genes increasing in plasticity during evolution in the hot  
380 environment and being differentially expressed in at least one assayed temperature. X- and Y-  
381 axis show the impact of adaptation to a hot environment on the gene expression at 15°C and 23°C  
382 relative to the ancestral population. Most of these genes evolved a change in expression in the  
383 opposite direction ( $p < 0.0001$ ) and are therefore located in the top-left and bottom-right quarters  
384 of the plot.  
385  
386  
387

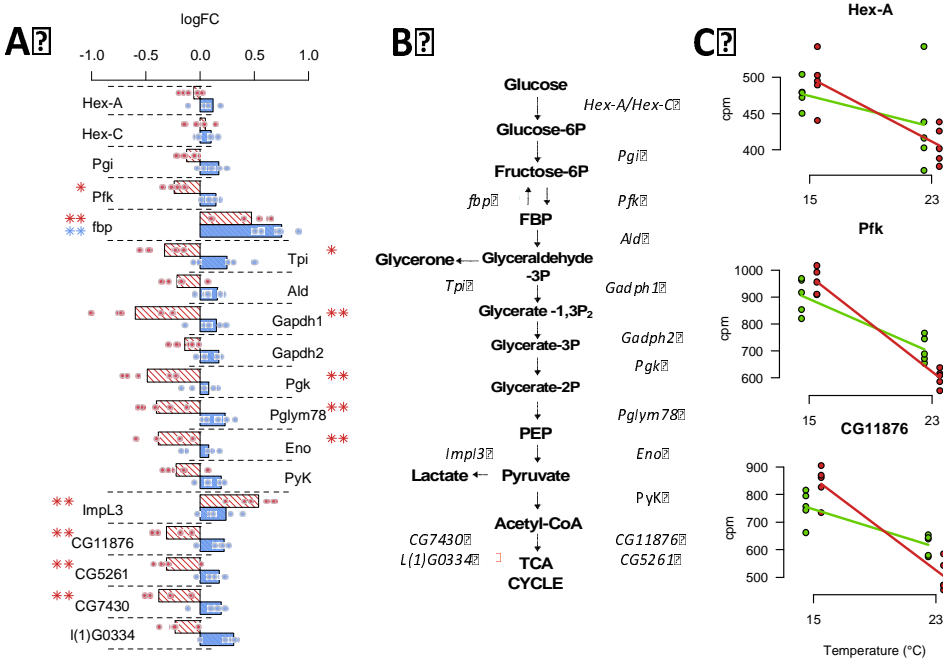

388

Fig. 4 Evolution of plasticity in the glycolysis pathway **A)** Bar chart of the  $\log_2FC$  of gene expression evolution from Fig. 2. The difference between the ancestral and the hot evolved populations measured at 15°C (blue) and 23°C (red) are shown. Single dots superimposed on the bar show the divergence of 5 hot-evolved replicates from the mean ancestral expression. **B)** Glycolysis pathway with the main regulatory enzymes from panel A. Most genes involved in glycolysis are significantly down regulated at 23°C ( \*\* FDR<0.05 , \* FDR<0.1). Even for comparisons with no statistically significant difference, most of the genes down regulated at 23°C are up-regulated at 15°C. **C)** Expression plasticity is highly reproducible across replicates. Three enzymes of the glycolysis pathway illustrate the highly consistent response across all five replicates. The ancestral replicate populations are indicated by green dots and the hot evolved populations by red dots (all genes are shown in a Supplementary File). Lines indicate plasticity based on the mean expressions values of the five replicates.

## Replicate specific evolution

Our previous analysis is looking for significant changes in expression across five independently evolved populations. Yet, it does not inform us about the parallel evolution of each population. We addressed this by analyzing each replicate independently to detect genes evolving increased or decreased phenotypic plasticity.

In each evolved population, we detected genes that evolved plasticity (range: 85-249, mean =134, 409 genes in total). Only 18 genes were significant in all 5 replicates and 272 in only a single population. Similarly to what we found in the main analysis, more genes displayed increased plasticity (ranging 63-175,n=318) than decreased plasticity (ranging 26-41, n=101). This observation is very consistent across populations: a gene that evolved plasticity in one replicate is found significant in another one with the same frequency (41% and 45% for genes decreasing and increasing plasticity respectively). For changes in reaction norm the consistency across replicates is highly dependent on the direction of change. We observed a low correlation for genes that evolved decreased plasticity (mean  $r^2= 0.03$ , see Fig. S5) while genes that increased plasticity were highly correlated among replicates (mean  $r^2=0.77$ , see Fig. S5).

420 A GO enrichment analysis at the replicate level showed that only chitin related  
421 gene ontologies were significantly enriched in all 5 evolved populations (see  
422 Table S5). The increased plasticity of the metabolism related genes were only  
423 significantly overrepresented in the first replicate. Nevertheless, we attribute  
424 this mainly to a lack of statistical power: the increase in plasticity for the genes  
425 involved in glycolysis and oxidative phosphorylation is consistent across all  
426 replicates (Fig. 5).  
427

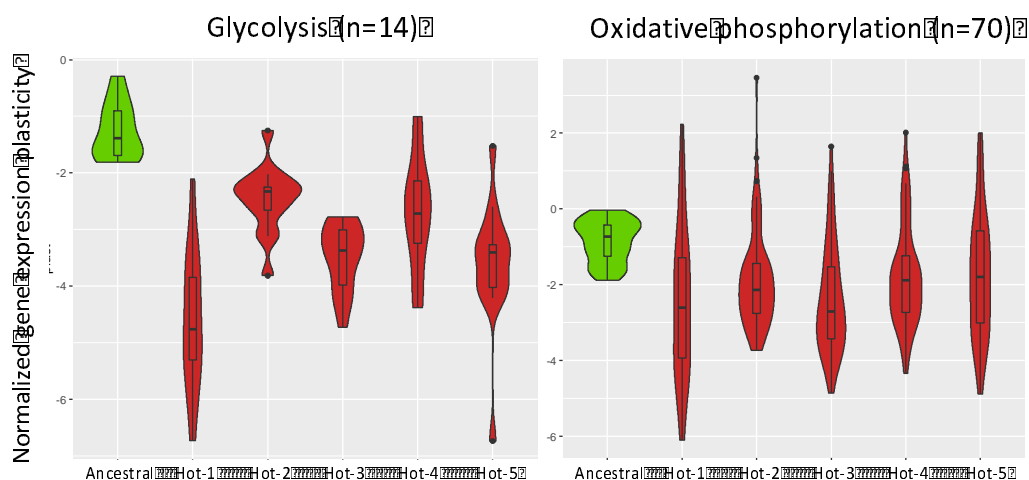

428  
429 Fig. 5: Highly consistent down-regulation of glycolysis and oxidative phosphorylation plasticity  
430 across all 5 hot-evolved replicates. The difference in expression between 15°C and 23°C of the  
431 ancestral population (green) is higher than in each of the evolved populations (red) indicating  
432 more negative reaction norms. We only show genes from the glycolysis and oxidative pathways  
433 that were ancestrally down-regulated (right panel, n=14, left panel, n=70).  
434

## 435 Discussion

### 436 Only limited counter-gradient evolution

437 Only very few studies were able to address the evolution of gene expression over  
438 short evolutionary time scales. The adaptation of *Drosophila melanogaster* to salt  
439 and cadmium-enriched medium (Huang and Agrawal 2016) showed that gene  
440 expression plasticity evolved, but in the opposite direction to the plasticity seen

441 in the ancestral populations. These food supplements are novel environmental  
 442 conditions, which are very rarely encountered by fruit flies in their natural  
 443 environments. The authors proposed that this counter-gradient evolution could  
 444 be explained by the selection on phenotypes that are only beneficial under these  
 445 extreme conditions, but not in the environments typically encountered by  
 446 *Drosophila*: the plastic response would correspond to a “stress” that is no longer  
 447 expressed when population are adapted to this new environment. This is in  
 448 sharp contrast to the experimental design of this study. Temperature is one of  
 449 the most important environmental factors driving local adaptation in ectotherms  
 450 (Angilletta and Angilletta 2009; Fuller and al. 2005). This applies also to  
 451 *Drosophila* (Zhao et al. 2015; Bergland et al. 2014; Machado et al. 2016;  
 452 Klepstatel et al. 2013) where significant clinal variation is seen on the genomic  
 453 and transcriptomic level (Zhao et al. 2015; Machado et al. 2016; Hoffmann and  
 454 Weeks 2007). Only a moderate fraction of genes (25% of all genes with evolved  
 455 plasticity) that experienced counter gradient evolution, i.e. a decrease in the  
 456 slope of the reaction norm. Interestingly, these genes were not enriched for  
 457 functional categories and did not evolve consistently across our replicates. Thus,  
 458 we failed to find biological processes for which gene expression plasticity would  
 459 be strongly maladaptive. More likely, the gene expression of these genes is not  
 460 well-adapted, possibly due to pleiotropic functional requirements, which are  
 461 relaxed in the laboratory environment. The large fraction of genes for which the  
 462 ancestral plasticity evolved to more extreme values suggests that the laboratory  
 463 conditions match many ecologically relevant forces encountered by natural  
 464 *Drosophila* populations.

In our study, we contrasted whole organisms gene expression across environments - a common practice in the study of gene expression evolution in *Drosophila* (Chen et al. 2015a, 2015b; Huang and Agrawal 2016; Zhao et al. 2015; Clemson et al. 2016; Levine et al. 2011; Porcelli et al. 2016; Yampolski et al. 2012; Zhou et al. 2012). Nevertheless, a potential problem is that during evolution allometric changes may occur - this is that the relative abundance of some cell types changes (Montgomery and Mank 2016). In fact, a recent study showed that females adapting to a new temperature regimes also evolved allometric changes, while males were much less affected (Hsu et al. 2020). While such allometric changes could affect gene expression means, the impact on plasticity is not clear. If the evolved allometric changes do not change with assaying temperature, no influence on the analysis of phenotypic plasticity is expected. On the other hand, if allometric changes are modulated by assaying temperature, this could be considered as an extended evolved phenotypic plasticity and will not affect our conclusions.

#### Plasticity in gene expression suggests adaptive plasticity

The evolutionary implication of phenotypic plasticity is a controversial topic with two extreme perspectives. With the same genotype expressing different phenotypes in response to the environment, it is often assumed that these phenotypes provide a higher fitness to their carriers (Via et al. 1995). If phenotypic plasticity results in a good match of phenotype and environment, this could even make genetic adaptation expendable (Charmantier et al. 2008). On the other hand, phenotypic plasticity of many traits may not contribute to fitness and reflects pleiotropic responses to environmental changes. This uncertainty about the evolutionary consequences has not yet been settled because of the

490 difficulty to link plasticity with fitness advantage. Our study links the  
 491 evolutionary response in a laboratory natural selection experiment to plasticity  
 492 in the founder population. Out of 3,605 genes with plastic gene expression  
 493 pattern after exposure to two temperatures, 327 genes (9%) changed plasticity  
 494 after 59 generations. Reasoning that the hot laboratory environment is more  
 495 extreme than the habitat of the founder population, genes with adaptive  
 496 plasticity for temperature should evolve towards increased plasticity (Lande  
 497 2009; Garland and Kelly 2006). Consistent, with this expectation, 75% of the  
 498 genes with evolved plasticity increased their environmental sensitivity. Genes  
 499 with increased thermal sensitivity showed functional enrichment and were more  
 500 consistent in their change across replicates. Our gene expression results are in  
 501 line with the prevalence of genetic variation for thermal plasticity in natural  
 502 *Drosophila* populations (Zhao et al. 2015; Levine et al. 2011, but see Clemson et  
 503 al. 2016). The parallel evolution in plasticity suggests a selective advantage of  
 504 populations with evolved plasticity, but our experiment cannot decide whether  
 505 the evolved plasticity is providing the fitness advantage or it is a pleiotropic  
 506 effect caused by the true target of selection. Finally, most of the genes with  
 507 increased plasticity showed an opposite evolutionary response at 15°C and 23°C  
 508 leading to the reinforcement of the ancestral plasticity which is expected in the  
 509 case of adaptive plasticity (Ghalambor et al. 2007, Ho and Zhang 2018).  
 510 Future experiments, measuring individual flies gene expression would allow us  
 511 to study the evolution of the trait gene expression plasticity. Comparing the trait  
 512 distribution in the ancestral and evolved populations after the new trait  
 513 optimum has been reached will provide further insights in the underlying  
 514 adaptive architecture.

# 515    Evolution of plasticity is more frequent than constitutive expression changes

516    In hot evolved populations, only 7% (52 out of 729) of the genes, which evolved  
517    a significant response relative to the founder population at 23°C, showed a  
518    constitutive expression difference rather than an evolutionary change of  
519    plasticity. It is not clear if this predominance of plastic response reflects the  
520    design of the laboratory natural selection experiment, which involved daily  
521    temperature fluctuation or a correlated response to directional selection  
522    (Garland and Kelly 2006).

523    While the flies evolved in a novel temperature regime with daily fluctuations, we  
524    measured gene expression in constant temperature regimes to avoid  
525    confounding effect of development at different temperatures. Classic examples  
526    for the persisting effects of short-term exposure to high temperatures are  
527    phenocopies. Short (<5h) sensitive periods of *Drosophila* pupae result in  
528    different phenotypes depending on the developmental stage during exposure  
529    (Mitchell and Lipps 1978). Hence, even small differences in developmental  
530    timing could result in large phenotypic variation within or between populations.  
531    Thus, we opted for a constant temperature common garden. This strategy  
532    assured phenotypic measurements insensitive to daily temperature fluctuations,  
533    reflecting fixed temperature effects that are comparable to existing phenotype  
534    data. Given that the expression of most genes changes monotonically with  
535    temperature (Chen et al. 2015a), we anticipated that observed differences in  
536    reaction norm at 15 and 23°C can be extrapolated to more extreme temperatures,  
537    such as 10 and 28°C.

538    While it is possible that the observed gene expression changes are not the direct  
539    target of selection, it would not challenge our claim that ancestral plasticity is

likely to be adaptive: even if the evolution of the gene expression in our experiment is only correlated with the selected trait(s), the ancestral plasticity we observed at the gene expression level remains an indicator of adaptive plasticity because the direction of change is, by definition, the same between these correlated traits. The validity of our conclusions would only be challenged if during evolution these phenotypic correlations across temperature were broken. We consider this, however, unlikely as the temperature response is conserved across populations and various *Drosophila* species (see also Zhao et al. 2015).

We previously identified SNF4Ay and Sestrin as targets of selection in the same hot evolved populations (Mallard et al. 2018). Both genes are associated with activity of AMPK, a key enzyme in metabolism regulation. Interestingly, the role of AMPK in thermal plasticity have been highlighted in marine invertebrates such as mussels and rock crabs that are regularly subjected to temperature variation during tides (Frederich et al. 2009 ; Jost et al. 2014). Moreover, mussels experience seasonal variation in thermal plasticity of AMPK activity (Jost et al. 2014), which is comparable to the evolution of plasticity in our evolved populations. In addition to metabolism, chitin synthesis was found to be plastic, which is shared with *D. melanogaster* (Chen et al. 2015) and in the North American cline (both *D. melanogaster* and *D. simulans* (Zhao et al. 2015)). Chitin is involved in exoskeleton morphogenesis and its decreased synthesis may be associated with the temperature-induced size reduction in *Drosophila*. However, we did not find any evolution of body size during our experiment (data not shown). Alternatively, chitin is also essential for trachea formation (Moussian et

564 al. 2005), and the evolution of its synthesis in our experiment could be linked  
565 with the decrease in metabolism gene expression.

566 Previous experimental evolution studies in *Drosophila* have found inconsistent  
567 results regarding the evolution of gene expression plasticity (Huang and Agrawal  
568 2016; Yampolski et al. 2012) and it is not clear if this inconsistency can be  
569 explained by different environmental stressors. On the other hand, it has been  
570 proposed that plasticity increases during the initial phase of adaptation to novel  
571 environments, followed by genetic assimilation (Lande 2009). In this theoretical  
572 scenario, also called “plasticity first” (Levis and Pfenning 2016; Levis et al. 2018),  
573 the genomic variation which encodes phenotypic plasticity is favored as a rapid  
574 phenotypic response. As a consequence, selection signatures are expected for  
575 genes modulating plasticity, rather than in cis-regulatory variation of genes with  
576 modified gene expression patterns.

577 In the context of the current ongoing climate change, the role of phenotypic  
578 plasticity has been widely discussed - does plasticity favor or limit genetic  
579 adaptation (Merilä and Hendry 2014; Sgrò et al. 2016; Vázquez et al. 2017;  
580 DeBiasse et al. 2018)? As recently stated by Kelly (2019), if plasticity is a major  
581 contributor of adaptation to climate change, then the amount of available genetic  
582 variation for plasticity could be a reliable predictor of a population vulnerability.

583 In particular, for *Drosophila*, the potential of plasticity for attenuating the impact  
584 of climate change has been challenged. Thermal plasticity does not correlate with  
585 latitude (Sørensen et al. 2016) and did not respond to laboratory natural  
586 selection in higher order phenotypes when submitted to stable or fluctuating  
587 environments (Fragata et al. 2016; Manenti et al. 2015). Our experiments  
588 provide some important insights into this debate. The highly parallel response in

replicated populations demonstrates that genetic variation in thermal plasticity is a reservoir for adaptation in novel thermal environments. Because we studied plasticity after only a moderate number of generations, our study is not informative for more long-term evolutionary processes. Recently, it has been shown that on the long term this evolutionary response could lead to extinction unless a small number of genetic loci are involved (Nunney 2016). Whether a phase of genetic assimilation will follow this initial increase in plasticity will depend on the availability of the relevant variation. If such variants are still segregating, it could be informative to test our experimental populations at later generations. If new mutations are required, experimental evolution in *Drosophila* may not be well-suited to address this question because the spread of new mutations is rare (Burke et al. 2010).

601

## 602 **Funding**

This work was supported by a Marie Skłodowska Curie Individual Fellowship (H2020-MSCA-IF-661149) to F.M. and the European Research Council (ERC) grant “ArchAdapt” awarded to C.S and the Austrian Science Funds (FWF, P29133). The funders had no role in study design, data collection and analysis, decision to publish, or preparation of the manuscript.

608

## 609 **Data Accessibility**

Sequence reads from this study will be available at the European Sequence Read Archive (<http://www.ebi.ac.uk/ena/>). Additionally, we will provide our gene expression count table and all our R code on dryad.

## 613 **References**

614 Angilletta Jr MJ, and Angilletta MJ. Thermal adaptation: a theoretical and  
615 empirical synthesis. Thermal adaptation: a theoretical and empirical  
616 synthesis. Oxford University Press; 2009.

617 Angilletta MJ, and Dunham AE. The temperature-size rule in ectotherms: simple  
618 evolutionary explanations may not be general. *Am Nat.* United States;  
619 2003;162:332-42.

620 Benjamini Y, and Hochberg Y. Controlling the false discovery rate: a practical and  
621 powerful approach to multiple testing. *Journal of the royal statistical society.*  
622 *Series B (Methodological).* JSTOR; 1995;:289-300.

623 Bergland AO, Behrman EL, O'Brien KR, Schmidt PS, and Petrov DA. Genomic  
624 evidence of rapid and stable adaptive oscillations over seasonal time scales  
625 in *Drosophila*. *PLoS Genetics.* United States; 2014;10:e1004775.

626 Braendle C, and Flatt T. A role for genetic accommodation in evolution?  
627 *Bioessays.* United States; 2006;28:868-73.

628 Burke MK, Dunham JP, Shahrestani P, Thornton KR, Rose MR, and Long AD.  
629 Genome-wide analysis of a long-term evolution experiment with *Drosophila*.  
630 *Nature.* England; 2010;467:587-90.

631 Charmantier A, McCleery RH, Cole LR, Perrins C, Kruuk LEB, and Sheldon BC.  
632 Adaptive Phenotypic Plasticity in Response to Climate Change in a Wild Bird  
633 Population. *Science.* 2008;320:800-803.

634 Chen J, Nolte V, and Schlötterer C. Temperature stress mediates decanalization  
635 and dominance of gene expression in *Drosophila melanogaster*. *PLoS Genet.*  
636 *Public Library of Science;* 2015;11:e1004883.

637 Chen J, Nolte V, and Schlötterer C. Temperature-Related Reaction Norms of Gene  
638 Expression: Regulatory Architecture and Functional Implications. *Molecular*  
639 *Biology and Evolution.* United States; 2015;32:2393-402.

640 Chevin L-M, and Hoffmann AA. Evolution of phenotypic plasticity in extreme  
641 environments. *Philosophical Transactions of the Royal Society of London B:*  
642 *Biological Sciences.* The Royal Society; 2017;372.

643 Clemson AS, Sgrò CM, and Telonis-Scott M. Thermal plasticity in *Drosophila*  
644 *melanogaster* populations from eastern Australia: quantitative traits to  
645 transcripts. *J Evol Biol.* Switzerland; 2016;29:2447-2463.

646 DeBiasse, MB, Kawji, Y, Kelly, MW. Phenotypic and transcriptomic responses to  
647 salinity stress across genetically and geographically divergent *Tigriopus*  
648 *californicus* populations. *Mol Ecol.* 2018;27:1621–1632.

649 Dewitt TJ, Sih A, and Wilson DS. Costs and limits of phenotypic plasticity. *Trends*  
650 *Ecol Evol.* England; 1998;13:77-81.

651 Dey S, Proulx SR, and Teotónio H. Adaptation to Temporally Fluctuating  
652 Environments by the Evolution of Maternal Effects. *PLoS Biol.*  
653 2016;14:e1002388.

654 Eden E, Navon R, Steinfeld I, Lipson D, and Yakhini Z. GOrilla: a tool for discovery  
655 and visualization of enriched GO terms in ranked gene lists. *BMC*  
656 *bioinformatics.* BioMed Central; 2009;10:1.

657 Forsman A. Rethinking phenotypic plasticity and its consequences for individuals,  
658 populations and species. *Heredity (Edinb).* England; 2015;115:276-84.

659 Fragata I, Lopes-Cunha M, Bárbaro M, Kellen B, Lima M, Faria GS, Seabra SG,  
660 Santos M, Simões P, and Matos M. Keeping your options open: Maintenance  
661 of thermal plasticity during adaptation to a stable environment. *Evolution.*  
662 United States; 2016;70:195-206.

663 Franssen SU, Kofler R, Schlötterer C. Uncovering the genetic signature of  
664 quantitative trait evolution with replicated time series data. *Heredity*.  
665 2017;118:42–51.

666 Fuller RC, Baer CF, and Travis J. How and When Selection Experiments Might  
667 Actually be Useful. *Integrative and Comparative Biology*. Oxford University  
668 Press; 2005;45:391-404.

669 Garland T, and Kelly SA. Phenotypic plasticity and experimental evolution. *J Exp*  
670 *Biol. England*; 2006;209:2344-61.

671 Ghalambor C., McKay J., Carroll S., and Reznick D.. Adaptive versus non-adaptive  
672 phenotypic plasticity and the potential for contemporary adaptation in new  
673 environments. 2007.

674 Ghalambor CK, Hoke KL, Ruell EW, Fischer EK, Reznick DN, and Hughes KA. Non-  
675 adaptive plasticity potentiates rapid adaptive evolution of gene expression in  
676 nature. *Nature. England*; 2015;525:372-5.

677 Hendry AP. Key Questions on the Role of Phenotypic Plasticity in Eco-  
678 Evolutionary Dynamics. *J Hered. United States*; 2016;107:25-41.

679 Ho WC, and Zhang J. Evolutionary adaptations to new environments generally  
680 reverse plastic phenotypic changes. *Nat Commun. England*; 2018;9:350.

681 Hoffmann AA, and Weeks AR. Climatic selection on genes and traits after a 100  
682 year-old invasion: a critical look at the temperate-tropical clines in  
683 *Drosophila melanogaster* from eastern Australia. *Genetica. Netherlands*;  
684 2007;129:133-47.

685 Hsu, S. K., Jakšić, A. M., Nolte, V., Lirakis, M., Kofler, R., Barghi, N., ... & Schlötterer,  
686 C. (2020). Rapid sex-specific adaptation to high temperature in *Drosophila*.  
687 *eLife*, 9, e53237.

688 Huang Y, and Agrawal AF. Experimental Evolution of Gene Expression and  
689 Plasticity in Alternative Selective Regimes. *PLOS Genetics*. 2016;12:1-23.

690 Kelly, MB. "Adaptation to Climate Change Through Genetic Accommodation and  
691 Assimilation of Plastic Phenotypes." *Phil Trans R Soc B* 2019; 374, no. 1768.

692 Klepsatel P, Gálíková M, De Maio N, Ricci S, Schlötterer C, and Flatt T.  
693 Reproductive and post-reproductive life history of wild-caught *Drosophila*  
694 *melanogaster* under laboratory conditions. *J Evol Biol. Switzerland*;  
695 2013;26:1508-20.

696 Kofler R, Orozco-terWengel P, De Maio N, Pandey RV, Nolte V, Futschik A, Kosiol  
697 C, and Schlötterer C. PoPoolation: a toolbox for population genetic analysis of  
698 next generation sequencing data from pooled individuals. *PloS one. Public*  
699 *Library of Science*; 2011;6:e15925.

700 Lande R. Adaptation to an extraordinary environment by evolution of phenotypic  
701 plasticity and genetic assimilation. *J Evol Biol. Switzerland*; 2009;22:1435-46.

702 Levine MT, Eckert ML, and Begun DJ. Whole-genome expression plasticity across  
703 tropical and temperate *Drosophila melanogaster* populations from Eastern  
704 Australia. *Mol Biol Evol. United States*; 2011;28:249-56.

705 Levis NA, and Pfennig DW. Evaluating 'Plasticity-First' Evolution in Nature: Key  
706 Criteria and Empirical Approaches. *Trends Ecol Evol. England*; 2016;31:563-  
707 574.

708 Levis NA, Isdaner AJ, and Pfennig DW. Morphological novelty emerges from pre-  
709 existing phenotypic plasticity. *Nat Ecol Evol. England*; 2018;2:1289-1297.

710 Liao Y, Smyth GK, and Shi W. The Subread aligner: fast, accurate and scalable  
711 read mapping by seed-and-vote. *Nucleic acids research*. Oxford Univ Press;  
712 2013;41:e108-e108.

713 Machado HE, Bergland AO, O'Brien KR, Behrman EL, Schmidt PS, and Petrov DA.  
714 Comparative population genomics of latitudinal variation in *Drosophila*  
715 *simulans* and *Drosophila melanogaster*. *Molecular Ecology*. England;  
716 2016;25:723-40.

717 Mallard F, Nolte V, Tobler R, Kapun M, and Schlötterer C. A simple genetic basis  
718 of adaptation to a novel thermal environment results in complex metabolic  
719 rewiring in *Drosophila*. *Genome Biol*. England; 2018;19:119.

720 Manenti T, Loeschcke V, Moghadam NN, and Sørensen JG. Phenotypic plasticity is  
721 not affected by experimental evolution in constant, predictable or  
722 unpredictable fluctuating thermal environments. *J Evol Biol*. Switzerland;  
723 2015;28:2078-87.

724 Merilä J, and Hendry AP. Climate change, adaptation, and phenotypic plasticity:  
725 the problem and the evidence. *Evol Appl*. England; 2014;7:1-14.

726 Mitchell HK, and Lipps LS. Heat shock and phenocopy induction in *Drosophila*.  
727 *Cell*. United States; 1978;15:907-18.

728 Montgomery, S. H., & Mank, J. E. (2016). Inferring regulatory change from gene  
729 expression: the confounding effects of tissue scaling. *Molecular ecology*,  
730 25(20), 5114-5128.

731 Moussian, B., Schwarz, H., Bartoszewski, S., & Nüsslein-Volhard, C. (2005).  
732 Involvement of chitin in exoskeleton morphogenesis in *Drosophila*  
733 *melanogaster*. *Journal of morphology*, 264(1), 117-130.

734 Nouhaud, P., Tobler, R., Nolte, V., & Schlötterer, C. (2016). Ancestral population  
735 reconstitution from isofemale lines as a tool for experimental evolution.  
736 *Ecology and evolution*, 6(20), 7169-7175.

737 Nunney L. Adapting to a Changing Environment: Modeling the Interaction of  
738 Directional Selection and Plasticity. *Journal of Heredity*. 2016;107:15-24.  
739 <http://dx.doi.org/10.1093/jhered/esv084>

740 Nussey DH, Postma E, Gienapp P, and Visser ME. Selection on heritable  
741 phenotypic plasticity in a wild bird population. *Science*. 2005;310:304-6.

742 Palmieri N, Nolte V, Chen J, and Schlötterer C. Genome assembly and annotation  
743 of a *Drosophila simulans* strain from Madagascar. *Molecular ecology*  
744 resources. Wiley Online Library; 2014;.

745 Pigliucci M. Evolution of phenotypic plasticity: where are we going now? *Trends*  
746 *Ecol Evol*. England; 2005;20:481-6.

747 Pigliucci M. Phenotypic plasticity : beyond nature and nurture. Phenotypic  
748 plasticity : beyond nature and nurture. Baltimore: Johns Hopkins University  
749 Press; 2001.

750 Porcelli D, Westram AM, Pascual M, Gaston KJ, Butlin RK, and Snook RR. Gene  
751 expression clines reveal local adaptation and associated trade-offs at a  
752 continental scale. *Scientific Reports*. England; 2016;6:32975.

753 Price TD, Qvarnström A, and Irwin DE. The role of phenotypic plasticity in  
754 driving genetic evolution. *Proceedings of the Royal Society of London Series*  
755 *B: Biological Sciences*. 2003;270:1433-1440.

756 Robinson MD, McCarthy DJ, and Smyth GK. edgeR: a Bioconductor package for  
757 differential expression analysis of digital gene expression data.  
758 *Bioinformatics*. Oxford Univ Press; 2010;26:139-140.

759 Sgrò CM, Terblanche JS, and Hoffmann AA. What Can Plasticity Contribute to  
760 Insect Responses to Climate Change? *Annu Rev Entomol.* United States;  
761 2016;61:433-51.

762 Sørensen JG, Kristensen TN, and Overgaard J. Evolutionary and ecological  
763 patterns of thermal acclimation capacity in *Drosophila*: is it important for  
764 keeping up with climate change? *Curr Opin Insect Sci.* Netherlands;  
765 2016;17:98-104.

766 Suzuki Y, and Nijhout HF. Evolution of a Polyphenism by Genetic Accommodation.  
767 *Science.* 2006;311:650-652.

768 Team RC. R: A language and environment for statistical computing. Vienna: R  
769 Foundation for Statistical Computing; 2016.

770 Vázquez DP, Gianoli E, Morris WF, and Bozinovic F. Ecological and evolutionary  
771 impacts of changing climatic variability. *Biol Rev Camb Philos Soc.* England;  
772 2017;92:22-42.

773 Via S, Gomulkiewicz R, De Jong G, Scheiner SM, Schlichting CD, and Van  
774 Tienderen PH. Adaptive phenotypic plasticity: consensus and controversy.  
775 *Trends Ecol Evol.* England; 1995;10:212-7.

776 Via, S. (1993). Adaptive phenotypic plasticity: target or by-product of selection in  
777 a variable environment?. *The American Naturalist*, 142(2), 352-365.

778 Wang L, Wang S, and Li W. RSeQC: quality control of RNA-seq experiments.  
779 *Bioinformatics.* Oxford Univ Press; 2012;28:2184-2185

780 West-Eberhard MJ. Developmental plasticity and evolution. Developmental  
781 plasticity and evolution. Oxford ; New York: Oxford University Press; 2003.

782 Whitman DW, and Ananthakrishna TN. Phenotypic plasticity of insects :  
783 mechanisms and consequences. Phenotypic plasticity of insects :  
784 mechanisms and consequences. USA: Science Publishers; 2009.

785 Wu TD, and Nacu S. Fast and SNP-tolerant detection of complex variants and  
786 splicing in short reads. *Bioinformatics.* Oxford Univ Press; 2010;26:873-881.

787 Yampolsky LY, Glazko GV, and Fry JD. Evolution of gene expression and  
788 expression plasticity in long-term experimental populations of *Drosophila*  
789 *melanogaster* maintained under constant and variable ethanol stress. *Mol*  
790 *Ecol.* England; 2012;21:4287-99.

791 Zhao L, Wit J, Svetec N, and Begun DJ. Parallel Gene Expression Differences  
792 between Low and High Latitude Populations of *Drosophila melanogaster* and  
793 *D. simulans*. *PLoS Genetics.* United States; 2015;11:e1005184.

794 Zhou S, Campbell TG, Stone EA, Mackay TF, and Anholt RR. Phenotypic plasticity  
795 of the *Drosophila* transcriptome. *PLoS Genet.* United States;  
796 2012;8:e1002593.

802 **Supplemental Figures**

803

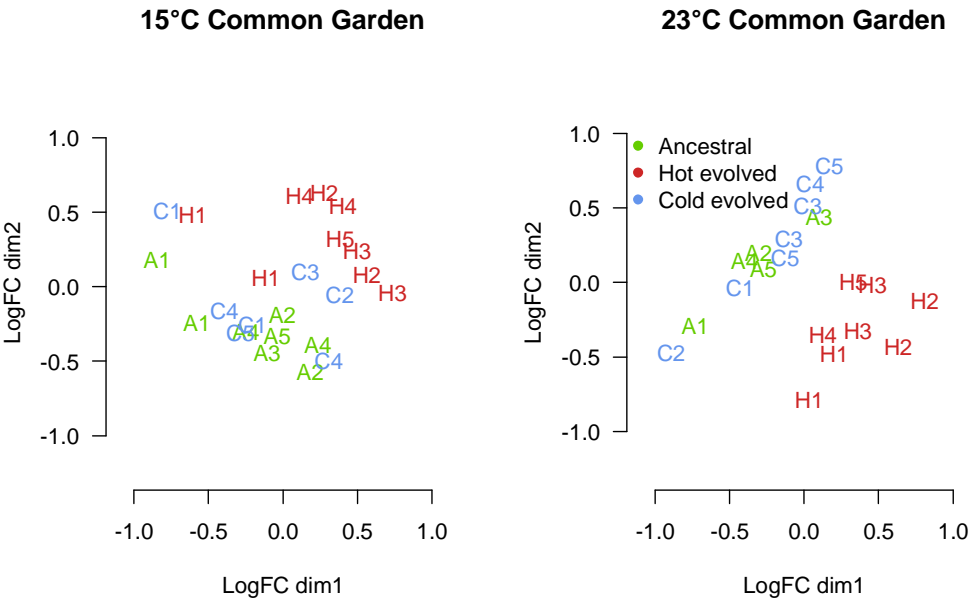

804

805

806

807

808

809

810

811

812

813

814

815

Fig. S1: Multi-dimensional scaling plots of the different samples. Ancestral, Cold evolved and Hot evolved population are respectively labeled A[1-5], C[1-5] and H[1-5] and colored in green, blue and red. Left and right panels respectively show the samples of the 15°C and 23°C common garden experiments. In both experiments, we did not detect any outliers.

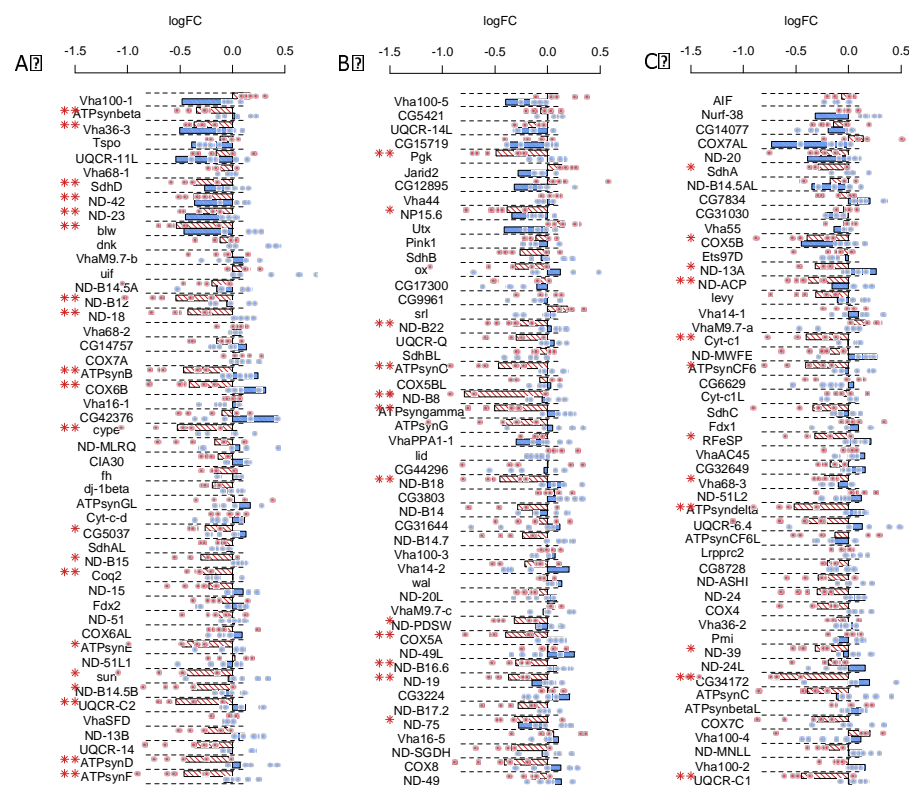

Fig. S2: Log<sub>2</sub>FC of gene expression between the ancestral and the hot evolved populations at 15°C (blue) and 23°C (red) of the 146 genes involved in the oxidative phosphorylation. Most of these genes are significantly down regulated at 23°C (n=45, \*\* FDR<0.05, \* FDR<0.1). Even though most comparison are not statistically significant, most of the down regulated genes at 23°C are up-regulated at 15°C. We produced independent plot for each gene showing the variability across our five replicates in a Supplementary File.

826

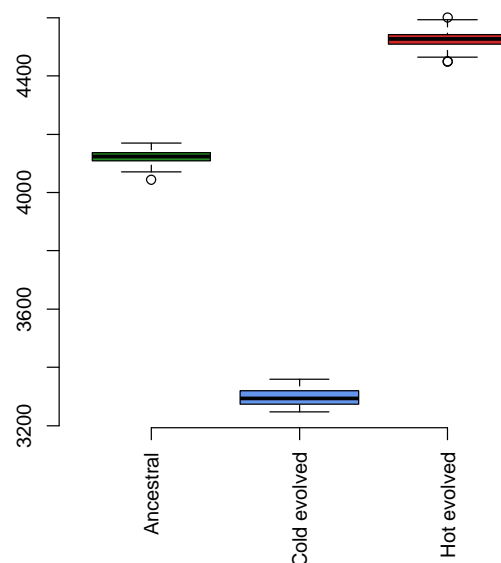

827

828 Fig. S3: The number of genes statistically plastic in the ancestral and the two  
829 groups of evolved populations after down-sampling each library to the same  
830 number of reads (14,464,603). These distribution result from 100 independent  
831 sampling of the complete libraries. Although the total number of plastic genes is  
832 smaller after the down-sampling, the differences between groups are similar.  
833

834

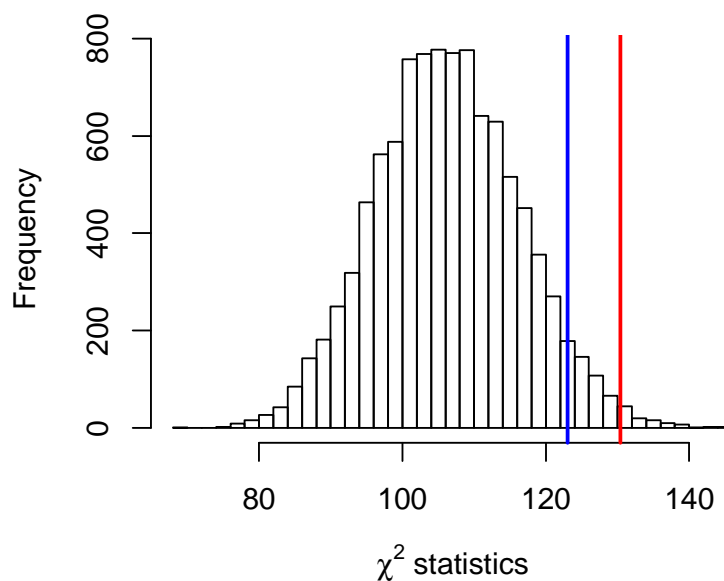

835

836

837

838

839

840

841

842

843

844

845

846

847

848

849

850

851

852

853

854

855

856

857

Fig. S4: The direction of the evolved gene expression change is highly correlated at 15°C and 23°C. Because the genes are unlikely to evolve independently, the  $\chi^2$  assumptions are violated. To overcome this limitation, we generated an empirical distribution of  $\chi^2$  statistics by bootstrapping the genes that had a significant change in plasticity during evolution in the hot environment and still found a more significant correlation for the sign of gene expression change at 15°C and 23°C than expected by chance. This empirical distribution of  $\chi^2$  statistics was obtained by bootstrapping 241 genes 10,000 times from the list of 417 genes that evolved a significant change in plasticity (FDR<0.1, here we did not condition on a significant evolution at 15°C or 23°C). For each list of 241 genes, a  $\chi^2$  test of independence was computed between the direction of the evolved expression change at 15°C and 23°C. The statistic obtained using the genes that evolved increased plasticity (observed data, red line) is larger than 99% of the statistics obtained by bootstrapping (the blue line shows the 95% threshold). This test indicates that the negative correlation observed for the list of genes showing increasing plasticity could not be obtained from a random sampling of genes showing overall plasticity evolution. Here we assume that both lists of genes have equal modularity: the evolution of a subset of these genes is due to a similar number of causative events.

858

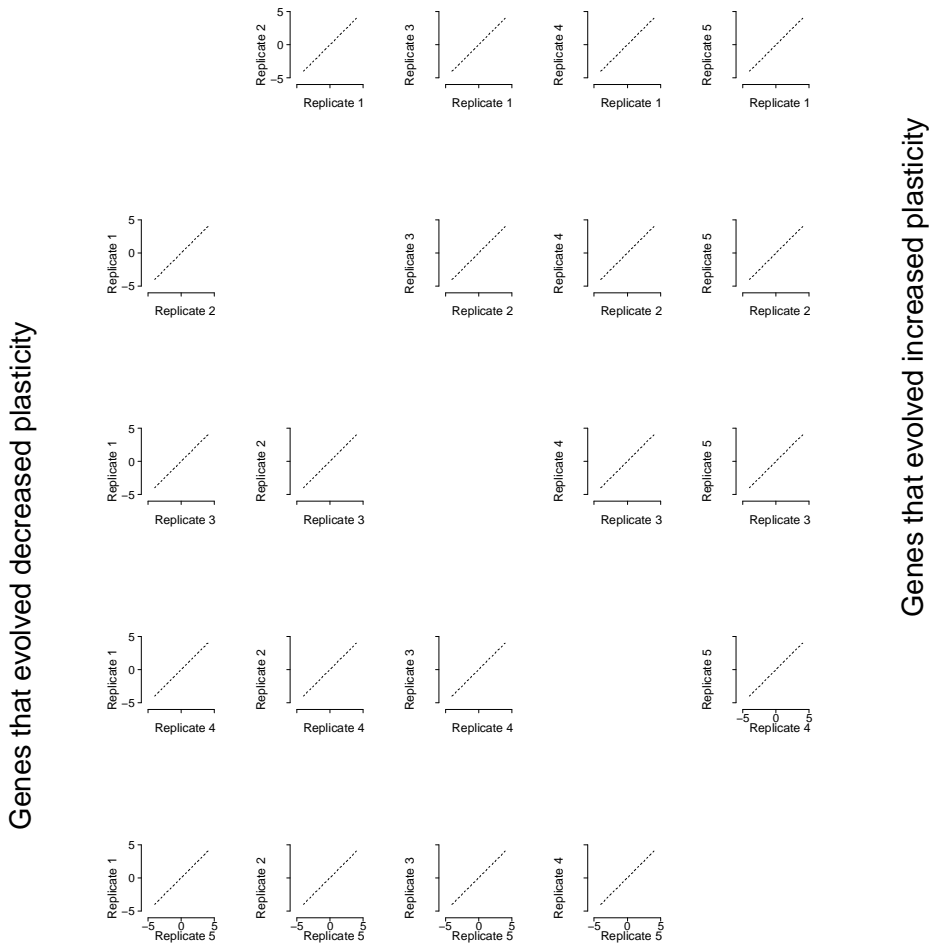

859 Fig. S5: Pairwise log2FC of reaction norm slopes between five evolved replicates  
860 (as rows and columns). The bottom half displays the genes with decreased  
861 plasticity during evolution and the top half the genes with increased plasticity  
862 during evolution (see Fig 1-3C with matching color code). There is a strong  
863 correlation of the plasticity evolution across all 5 hot-evolved replicates for  
864 genes with increased plasticity (top) but not for genes with decreased plasticity  
865 (bottom).  
866  
867  
868  
869

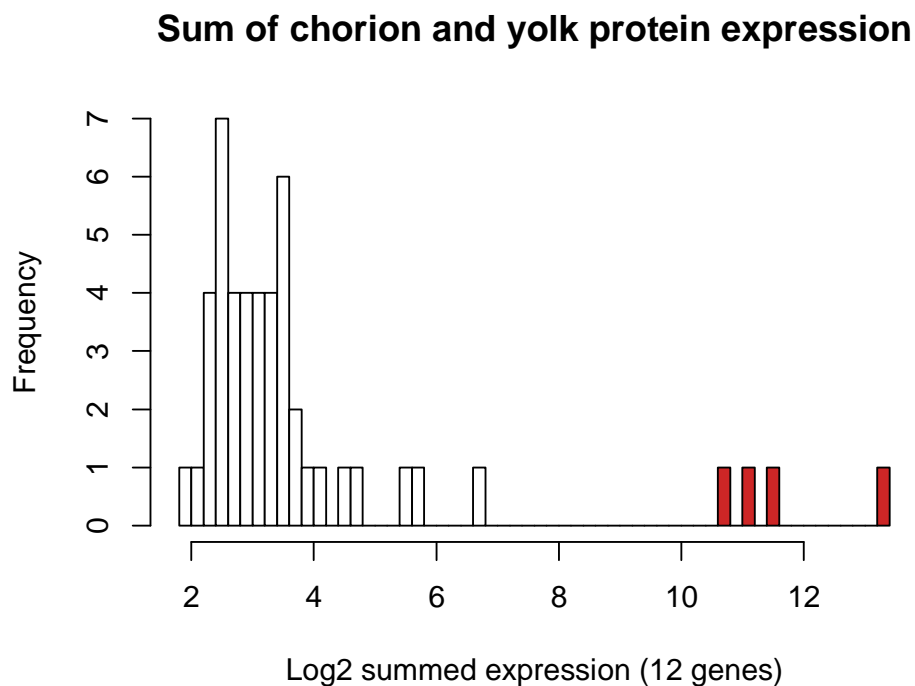

870  
871 Fig. S6: Identification of libraries with female contamination. We summed the  
872 expression of the nine chorion genes (CP15 to 19, CP36, CP38) and three yolk  
873 proteins (YP1 to 3). We excluded four outlier libraries (in red) with > 1769  
874 counts per million reads for the 12 indicator genes. The retained libraries had <  
875 111 counts per million reads.  
876  
877
